# Supplementary material
Source: Springer Nature journal article supplement (https://mijn.bsl.nl/resource/supplementary/13047_2009_116_MOESM8_ESM.pdf/7110100)

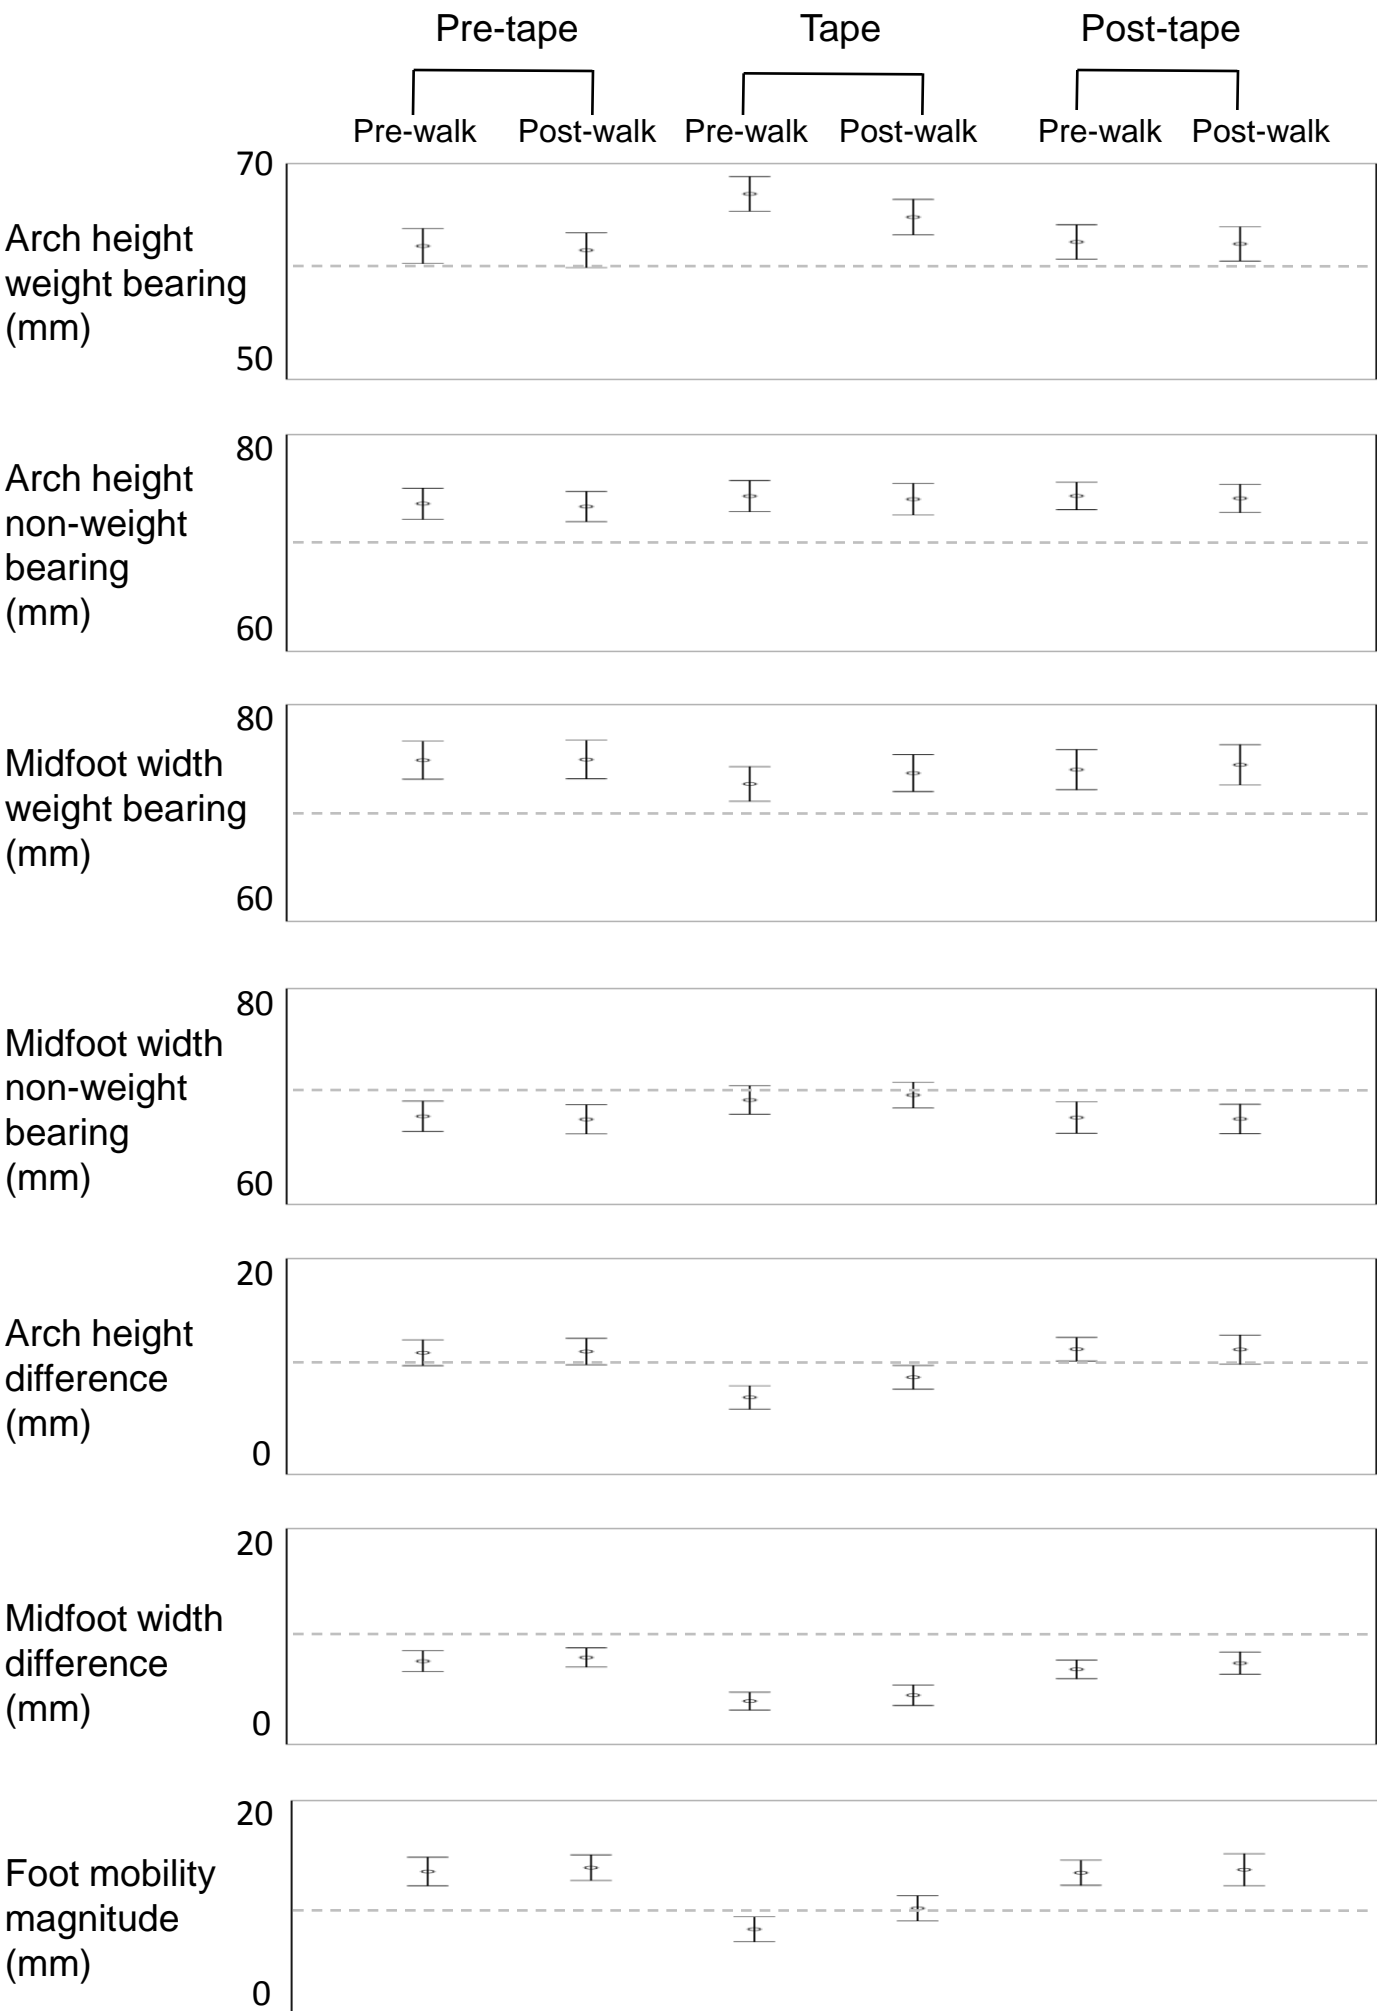

Supplement: MOESM8 [file 7110100]
